# Supplementary material
Source: Springer Nature journal article supplement (https://www.springerprofessional.de/resource/supplementary/13638_2013_894_MOESM8_ESM.pdf/11899122)

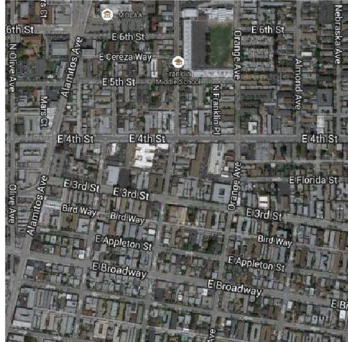

(a) Satellite screenshot

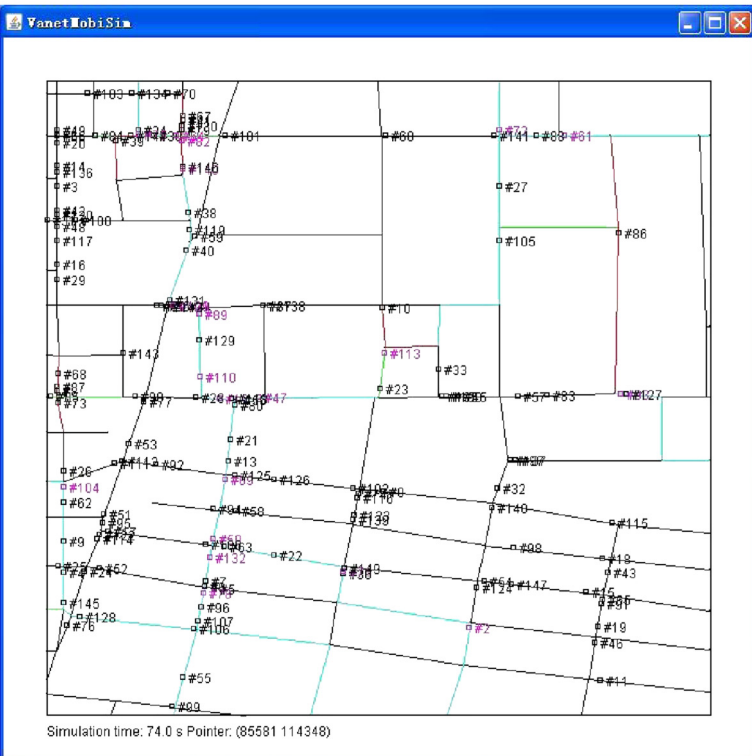

(b) Generated topology by Vanetmobisim

Supplement: MOESM8 [file 11899122]
